# Supplementary material for: Seroprevalence of Hepatitis B, C and D in Vietnam: A systematic review and meta-analysis
Source: PubMed Central journal article supplement — Lancet Reg Health West Pac. 2022 May 4;24:100468. doi: 10.1016/j.lanwpc.2022.100468 (PMC9096228; doi:10.1016/j.lanwpc.2022.100468), 2022-05-04
Supplement: mmc2.pdf [file mmc2.pdf]

1 **SUPPLEMENTARY SECTION**

2

3 **Seroprevalence of Hepatitis B, C and D in Vietnam: a systematic review and meta-analysis**

4 **TLRHWESTERNPACIFIC-D-22-00076**

5

6 **SEARCH STRATEGY**

7 **PubMed:**

8 Free text advanced search: 'Hepatitis B' OR 'Hepatitis C' OR 'Hepatitis D' AND 'Vietnam' AND  
9 'Prevalence' with date filter 1990 – 2021 elicits 327 results.

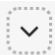

Search: **Hepatitis B OR Hepatitis C OR Hepatitis D AND Vietnam AND Prevalence** Filters: **from 1990 - 2021**

327

((("hepatitis b"[MeSH Terms] OR "hepatitis b"[All Fields] OR ("hepatitis c"[MeSH Terms] OR "hepatitis c"[All Fields] OR "hepacivirus"[MeSH Terms] OR "hepacivirus"[All Fields]) OR ("hepatitis d"[MeSH Terms] OR "hepatitis d"[All Fields])) AND ("vietnam"[MeSH Terms] OR "vietnam"[All Fields] OR "vietnam s"[All Fields]) AND ("epidemiology"[MeSH Subheading] OR "epidemiology"[All Fields] OR "prevalence"[All Fields] OR "prevalence"[MeSH Terms] OR "prevalance"[All Fields] OR "prevalences"[All Fields] OR "prevalence s"[All Fields] OR "prevalent"[All Fields] OR "prevalently"[All Fields] OR "prevalents"[All Fields])) AND (1990:2021[pdat])

**Translations**

**Hepatitis B:** "hepatitis b"[MeSH Terms] OR "hepatitis b"[All Fields]

**Hepatitis C:** "hepatitis c"[MeSH Terms] OR "hepatitis c"[All Fields] OR "hepacivirus"[MeSH Terms] OR "hepacivirus"[All Fields]

**Hepatitis D:** "hepatitis d"[MeSH Terms] OR "hepatitis d"[All Fields]

**Vietnam:** "vietnam"[MeSH Terms] OR "vietnam"[All Fields] OR "vietnam's"[All Fields]

**Prevalence:** "epidemiology"[Subheading] OR "epidemiology"[All Fields] OR "prevalence"[All Fields] OR "prevalence"[MeSH Terms] OR "prevalance"[All Fields] OR "prevalences"[All Fields] OR "prevalence's"[All Fields] OR "prevalent"[All Fields] OR "prevalently"[All Fields] OR "prevalents"[All Fields]

10

11

12 **Embase:**

13 Free text advanced search 'Hepatitis B' OR 'Hepatitis C' OR 'Hepatitis D' AND 'Vietnam' AND  
14 'Prevalence' with date filter 1990 – 2021 in Embase Classic+Embase (1947 to 2022 March 11), Global  
15 Health (OVID) (1973 to 2022 Week 10)

# ▲ Searches

Results Type

1 ► ((Hepatitis B or Hepatitis C or Hepatitis D) and Vietnam and prevalence).mp. [mp=ti, ab, hw, tn, ot, dm, mf, dv, kf, fx, dq, bt, id, cc]

370 Advanced

16

1 **Full titles of included studies**

2 **Table S1: Hepatitis B studies (n=44)**

| <b>Title</b>                                                                                                                                                                                                         | <b>Author</b>         |
|----------------------------------------------------------------------------------------------------------------------------------------------------------------------------------------------------------------------|-----------------------|
| Short report: hepatitis B infection and severe Plasmodium falciparum malaria in Vietnamese adults                                                                                                                    | Barcus et al 2002     |
| Prevalence of hepatitis A, B, C and E virus markers among patients with elevated levels of Alanine aminotransferase and Aspartate aminotransferase in Phnom Penh (Cambodia) and Nha Trang (Central Vietnam) [French] | Buchy et al 2004      |
| Malaria in injection drug abusers in Vietnam                                                                                                                                                                         | Chau et al 2002       |
| Sexual practices, partner concurrency and high rates of sexually transmissible infections among male sex workers in three cities in Vietnam                                                                          | Clatts et al 2015     |
| Viral infections and chemical exposures as risk factors for hepatocellular carcinoma in Vietnam                                                                                                                      | Cordier et al 1993    |
| Acute viral hepatitis in Hanoi, Viet Nam                                                                                                                                                                             | Corwin et al 1996     |
| High prevalences of hepatitis B and C virus infections among adults living in Binh Thuan province, Vietnam                                                                                                           | Do et al 2015         |
| A multicentre molecular analysis of hepatitis B and blood-borne virus coinfections in Viet Nam                                                                                                                       | Dunford et al 2012    |
| Risk factors for hepatitis B infection in rural Vietnam                                                                                                                                                              | Duong et al 2009      |
| Hepatitis B and C virus infections among patients with end stage renal disease in a low-resourced hemodialysis center in Vietnam: a cross-sectional study                                                            | Duong et al 2015 i    |
| Challenges of hemodialysis in Vietnam: experience from the first standardized district dialysis unit in Ho Chi Minh City                                                                                             | Duong et al 2015 ii   |
| Shewhart Charts and Two-Monthly Screening Interval to Monitor Hepatitis C and Hepatitis B Virus Infections in Two-Year Prospective Cohort Study of Hemodialysis Patients in Vietnam                                  | Duong et al 2016      |
| Clinical and biological characteristics of HIV infected and uninfected IDUs in HCMC vietnam                                                                                                                          | Follezou et al 1999   |
| Prevalence of and Factors Associated with Reproductive Tract Infections among Pregnant Women in Ten Communes in Nghe An Province, Vietnam                                                                            | Goto et al 2005       |
| Hepatitis B infection in rural Vietnam and the implications for a national program of infant immunization                                                                                                            | Hipgrave et al 2003   |
| Impact of a methadone maintenance therapy pilot in Vietnam and its role in a scaled-up response                                                                                                                      | Hoang et al 2015      |
| Discrepancies in prevalence trends for HIV, hepatitis B virus, and hepatitis C virus in Haiphong, Vietnam from 2007 to 2012                                                                                          | Ishizaki et al 2017   |
| Prevalence of hepatitis B, hepatitis C and GB virus C /hepatitis G virus infections in liver disease patients and habitants in HCM vietnam                                                                           | Kakumu et al 1998     |
| Seroprevalence of hepatitis viruses in children in rural Viet Nam                                                                                                                                                    | Katellaris et al 1995 |
| Impact of Nucleic Acid Testing (NAT) on screening blood donors at a tertiary center in Vietnam                                                                                                                       | Kha To et al 2020     |
| Reproductive tract infections including sexually transmitted infections: a population-based study of women of reproductive age in a rural district of Vietnam                                                        | Lan et al 2008        |
| Epidemiology of hepatitis C virus infection in Vietnam. [French]                                                                                                                                                     | Lien et al 1997       |

|                                                                                                                                                                                                                  |                         |
|------------------------------------------------------------------------------------------------------------------------------------------------------------------------------------------------------------------|-------------------------|
| High hepatitis C virus infection among female sex workers in Viet Nam: strong correlation with HIV and injection drug use                                                                                        | Linh-Vi et al 2019      |
| The Prevalence and Components of Metabolic Syndrome in Men from Infertile Couples and Its Relation on Semen Analysis                                                                                             | Minh et al 2021         |
| Hepatitis B virus infection among pregnant mothers and children after the introduction of the universal vaccination program in Central Vietnam                                                                   | Miyakawa et al 2021     |
| Findings from Integrated Behavioral and Biologic Survey among males who inject drugs (MWID)-Vietnam, 2009-2010: Evidence of the need for an integrated response to HIV, hepatitis B virus, and hepatitis C virus | Nadol et al 2015        |
| High hepatitis C virus (HCV) prevalence among men who have sex with men (MSM) in Vietnam and associated risk factors: 2010 Vietnam Integrated Behavioural and Biologic Cross-Sectional Survey                    | Nadol et al 2016        |
| Hepatitis C and B virus infections in populations at low or high risk in Ho Chi Minh and Hanoi, Vietnam                                                                                                          | Nakata et al 1994       |
| High rates of positive viral hepatitis serologic in patients attending a city hospital challenge healthcare providers                                                                                            | Ngo et al 2009          |
| The impact of dengue haemorrhagic fever on liver function                                                                                                                                                        | Nguyen et al 1997       |
| Highly endemic hepatitis B infection in rural Vietnam                                                                                                                                                            | Nguyen et al 2006       |
| Prevalence of HBV infection among different HIV-risk groups in Hai Phong, Vietnam                                                                                                                                | Nguyen et al 2011       |
| A reduction in chronic hepatitis B virus infection prevalence among children in Vietnam demonstrates the importance of vaccination                                                                               | Nguyen et al 2014       |
| High burden of hepatocellular carcinoma and viral hepatitis in Southern and Central Vietnam: Experience of a large tertiary referral center, 2010 to 2016                                                        | Nguyen-Dinh et al 2018  |
| Hepatitis B Infection and Mother-to-Child Transmission in Haiphong, Vietnam: A Cohort Study with Implications for Interventions                                                                                  | Pham et al 2020         |
| Prevalence and factors associated with chronic Hepatitis B infection among adults in the Central Highland, Vietnam                                                                                               | Pham et al 2020 ii      |
| Risks for HIV, HBV, and HCV infections among male injection drug users in northern Vietnam: A case-control study                                                                                                 | Quan et al 2009         |
| Markers of hepatitis C and B virus infections among blood donors in Ho Chi Minh City and Hanoi, Vietnam.                                                                                                         | Song et al 1994         |
| Prevalence of hepatitis B and hepatitis C in healthy adults in Ho Chi Minh City                                                                                                                                  | Terakawa et al 2011     |
| Baseline Characteristics and Treatment Cost of Hepatitis C at Hospital for Tropical Diseases, Ho Chi Minh City, Vietnam in Direct-Acting Antiviral Treatment Era                                                 | Thanh et al 2020        |
| Liver involvement associated with dengue infection in adults in Vietnam                                                                                                                                          | Trung et al 2010        |
| Hepatitis B in Ho Chi Minh City, Viet Nam                                                                                                                                                                        | Van Be et al 1992       |
| Epidemiological Characteristics of Advanced Hepatocellular Carcinoma in the Northern Region of Vietnam                                                                                                           | Van Quang Le et al 2019 |
| Prevalence of hepatitis B & hepatitis C virus infections in potential blood donors in rural Vietnam.                                                                                                             | Viet et al 2012         |

1  
2  
3  
4

1 **Table S2: Hepatitis C studies (n=44)**

2

| <b>Title</b>                                                                                                                                                                                                         | <b>Author</b>         |
|----------------------------------------------------------------------------------------------------------------------------------------------------------------------------------------------------------------------|-----------------------|
| Prevalence of hepatitis A, B, C and E virus markers among patients with elevated levels of Alanine aminotransferase and Aspartate aminotransferase in Phnom Penh (Cambodia) and Nha Trang (Central Vietnam) [French] | Buchy et al 2004      |
| Malaria in injection drug abusers in Vietnam                                                                                                                                                                         | Chau et al 2002       |
| Prevalence and incidence of HCV infection among Vietnam heroin users with recent onset of injection                                                                                                                  | Clatts et al 2009     |
| HIV, Hepatitis C, and Other Sexually Transmitted Infections Among Male Sex Workers in Ho Chi Minh City, Vietnam                                                                                                      | Colby et al 2016      |
| Viral infections and chemical exposures as risk factors for hepatocellular carcinoma in Vietnam                                                                                                                      | Cordier et al 1993    |
| Acute viral hepatitis in Hanoi, Viet Nam                                                                                                                                                                             | Corwin et al 1996     |
| High prevalences of hepatitis B and C virus infections among adults living in Binh Thuan province, Vietnam                                                                                                           | Do et al 2015         |
| Hepatitis C virus in Vietnam: high prevalence of infection in dialysis and multi-transfused patients involving diverse and novel virus variants                                                                      | Dunford et al 2012    |
| Hepatitis B and C virus infections among patients with end stage renal disease in a low-resourced hemodialysis center in Vietnam: a cross-sectional study                                                            | Duong et al 2015 i    |
| Challenges of hemodialysis in Vietnam: experience from the first standardized district dialysis unit in Ho Chi Minh City                                                                                             | Duong et al 2015 ii   |
| Shewhart Charts and Two-Monthly Screening Interval to Monitor Hepatitis C and Hepatitis B Virus Infections in Two-Year Prospective Cohort Study of Hemodialysis Patients in Vietnam                                  | Duong et al 2016      |
| Risk Behaviors for HIV and HCV Infection Among People Who Inject Drugs in Hai Phong, Viet Nam, 2014                                                                                                                  | Duong et al 2018      |
| Screening haemodialysis patients for hepatitis C in Vietnam: The inconsistency between common hepatitis C virus serological and virological tests                                                                    | Duong et al 2019      |
| Clinical and biological characteristics of HIV infected and uninfected IDUs in HCMC vietnam                                                                                                                          | Follezou et al 1999   |
| Impact of a methadone maintenance therapy pilot in Vietnam and its role in a scaled-up response                                                                                                                      | Hoang et al 2015      |
| Discrepancies in prevalence trends for HIV, hepatitis B virus, and hepatitis C virus in Haiphong, Vietnam from 2007 to 2012                                                                                          | Ishizaki et al 2017   |
| Prevalence of hepatitis B, hepatitis C and GB virus C /hepatitis G virus infections in liver disease patients and habitants in HCM vietnam                                                                           | Kakumu et al 1998     |
| Seroprevalence of hepatitis viruses in children in rural Viet Nam                                                                                                                                                    | Katellaris et al 1995 |
| Impact of Nucleic Acid Testing (NAT) on screening blood donors at a tertiary center in Vietnam                                                                                                                       | Kha To et al          |
| Epidemiology of hepatitis C virus infection in Vietnam. [French]                                                                                                                                                     | Lien et al 1997       |
| High hepatitis C virus infection among female sex workers in Viet Nam: strong correlation with HIV and injection drug use                                                                                            | Linh-Vi et al 2019    |
| HIV control programs reduce HIV incidence but not HCV incidence among people who inject drugs in HaiPhong, Vietnam                                                                                                   | Molès et al 2020      |

|                                                                                                                                                                                                                  |                        |
|------------------------------------------------------------------------------------------------------------------------------------------------------------------------------------------------------------------|------------------------|
| Findings from Integrated Behavioral and Biologic Survey among males who inject drugs (MWID)-Vietnam, 2009-2010: Evidence of the need for an integrated response to HIV, hepatitis B virus, and hepatitis C virus | Nadol et al 2015       |
| High hepatitis C virus (HCV) prevalence among men who have sex with men (MSM) in Vietnam and associated risk factors: 2010 Vietnam Integrated Behavioural and Biologic Cross-Sectional Survey                    | Nadol et al 2016       |
| Findings from Integrated Behavioral and Biologic Survey among males who inject drugs (MWID)-Vietnam, 2009-2010: Evidence of the need for an integrated response to HIV, hepatitis B virus, and hepatitis C virus | Nadol et al 2016       |
| Hepatitis C and B virus infections in populations at low or high risk in Ho Chi Minh and Hanoi, Vietnam                                                                                                          | Nakata et al 1994      |
| Lack of association between acquisition of TT virus and risk behavior for HIV and HCV infection in Vietnam                                                                                                       | Nerurkar et al 1999    |
| High rates of positive viral hepatitis serologic in patients attending a city hospital challenge healthcare providers                                                                                            | Ngo et al 2009         |
| The impact of dengue haemorrhagic fever on liver function                                                                                                                                                        | Nguyen et al 1997      |
| Prevalence and risk factors for hepatitis C infection in rural north vietnam                                                                                                                                     | Nguyen et al 2007      |
| Acceptability and Usability of HCV Self-Testing in High Risk Populations in Vietnam                                                                                                                              | Nguyen et al 2021      |
| High burden of hepatocellular carcinoma and viral hepatitis in Southern and Central Vietnam: Experience of a large tertiary referral center, 2010 to 2016                                                        | Nguyen-Dinh et al 2018 |
| Risks for HIV, HBV, and HCV infections among male injection drug users in northern Vietnam: A case-control study                                                                                                 | Quan et al 2009        |
| Hepatitis C virus seroprevalence in the general female population from 8 countries                                                                                                                               | Quesada et al 2015     |
| Towards Targeted Interventions in Low- and Middle-Income Countries: Risk Profiles of People Who Inject Drugs in Haiphong (Vietnam)                                                                               | Riondel et al 2020     |
| The evolution of hepatitis C in the kidney transplant recipient at CHO ray hospital                                                                                                                              | Sinh et al 2012        |
| Markers of hepatitis C and B virus infections among blood donors in Ho Chi Minh City and Hanoi, Vietnam.                                                                                                         | Song et al 1994        |
| Multiple routes of hepatitis C virus transmission among injection drug users in Hai Phong, Northern Vietnam                                                                                                      | Tanimoto et al 2010    |
| Prevalence of hepatitis B and hepatitis C in healthy adults in Ho Chi Minh City                                                                                                                                  | Terakawa et al 2011    |
| Prevalence of hepatitis virus types B through E and genotypic distribution of HBV and HCV in Ho Chi Minh City, Vietnam                                                                                           | Tran et al 2003        |
| Liver involvement associated with dengue infection in adults in Vietnam                                                                                                                                          | Trung et al 2010       |
| Epidemiological Characteristics of Advanced Hepatocellular Carcinoma in the Northern Region of Vietnam                                                                                                           | Van Quang et al 2019   |
| Prevalence of hepatitis B & hepatitis C virus infections in potential blood donors in rural Vietnam.                                                                                                             | Viet et al 2012        |
| Prevalence and correlates of HCV mono-infection and HIV and HCV coinfection among persons who inject drugs in Vietnam                                                                                            | Zhang et al 2015       |

1

2

3

1 **Table S3: HIV studies with HBV or HCV co-infection data (n=10)**

2

| Title                                                                                                                                                                                        | Author                |
|----------------------------------------------------------------------------------------------------------------------------------------------------------------------------------------------|-----------------------|
| TAHOD-LITE: Antiretroviral Treatment for Adult HIV Infection in Asia, 1998 to 2013                                                                                                           | Boettiger et al 2015  |
| HBV and HCV Coinfection among HIV/AIDS Patients in the National Hospital of Tropical Diseases, Vietnam                                                                                       | Bùi et al 2014        |
| Prevalence of Opportunistic Infections and Associated Factors in HIV-Infected Men Who Have Sex With Men on Antiretroviral Therapy in Bach Mai Hospital, Hanoi, Vietnam: A Case-Control Study | Dang et al 2020       |
| Epidemiology of hepatitis C virus infection in Vietnam. [French]                                                                                                                             | Lien et al 1997       |
| Viral hepatitis among HIV+ patients in northern Vietnam                                                                                                                                      | Mohan et al 2017      |
| High Proportion of HIV-HCV Coinfected Patients with Advanced Liver Fibrosis Requiring Hepatitis C Treatment in Haiphong, Northern Vietnam (ANRS 12262)                                       | Nguyen et al 2016     |
| Factors associated with HIV RNA viral loads in ART-naïve patients: implications for treatment as prevention in concentrated epidemics                                                        | Rangarajan et al 2016 |
| Penicilliosis and AIDS in Haiphong, Vietnam: evolution and predictive factors of death                                                                                                       | Son et al 2014        |
| Long-term viral suppression and immune recovery during first-line antiretroviral therapy: a study of an HIV-infected adult cohort in Hanoi, Vietnam                                          | Tanuma et al 2017     |

3

4

5 **Table S4: HDV studies (n=7)**

6

| Title                                                                                                                             | Author             |
|-----------------------------------------------------------------------------------------------------------------------------------|--------------------|
| HDV infection rates in northern Vietnam                                                                                           | Binh et al 2018    |
| A multicentre molecular analysis of hepatitis B and blood-borne virus coinfections in Viet Nam                                    | Dunford et al 2012 |
| High prevalence of hepatitis delta virus among persons who inject drugs, Vietnam                                                  | Hall et al 2015    |
| Predominance of HBV Genotype B and HDV Genotype 1 in Vietnamese Patients with Chronic Hepatitis                                   | Nghiem et al 2021  |
| Prevalence and genotype distribution of hepatitis delta virus among chronic hepatitis B carriers in Central Vietnam               | Nguyen et al 2017  |
| High prevalence and significance of hepatitis D virus infection among treatment-naïve HBsAg-positive patients in Northern Vietnam | Sy et al 2013      |
| Prevalence of hepatitis virus types B through E and genotypic distribution of HBV and HCV in Ho Chi Minh City, Vietnam            | Tran et al 2003    |

7

8

9

1 **Table S5: Joanna Briggs Institute (JBI) critical appraisal checklist for prevalence data for all 72 included**  
 2 **studies**

3 Critical appraisal of study quality was performed by BF (first author) and HVTK (third author). Discrepancies  
 4 regarding study eligibility were resolved through discussion between investigators (HVTK, BF).

- 5 1. Was the sample frame appropriate to address the target population?  
 6 2. Were study participants recruited in an appropriate way?  
 7 3. Was the sample size adequate?  
 8 4. Were the study subjects and setting described in detail?  
 9 5. Was data analysis conducted with sufficient coverage of the identified sample?  
 10 6. Were valid methods used for the identification of the condition?  
 11 7. Was the condition measured in a standard, reliable way for all participants?  
 12 8. Was there appropriate statistical analysis?  
 13 9. Was the response rate adequate, and if not, was the low response rate managed appropriately?  
 14

| Study                | JBI checklist indicators |     |     |     |     |     |     |     |     | Score | Comment                                                                     |
|----------------------|--------------------------|-----|-----|-----|-----|-----|-----|-----|-----|-------|-----------------------------------------------------------------------------|
|                      | 1                        | 2   | 3   | 4   | 5   | 6   | 7   | 8   | 9   |       |                                                                             |
| Barcus et al 2002    | No                       | No  | Yes | 7     | Non-random consecutive sampling, non-representative sample (severe malaria) |
| Binh et al 2018      | No                       | No  | Yes | 7     | Non-random consecutive sampling, non-representative sample (85% male)       |
| Boettiger et al 2015 | Yes                      | No  | Yes | 8     | Non-random consecutive sampling                                             |
| Buchy et al 2004     | Yes                      | No  | No  | Yes | Yes | Yes | Yes | Yes | Yes | 7     | Non-random consecutive sampling, underpowered                               |
| Bùi et al 2014       | Yes                      | No  | Yes | 8     | Non-random; entire centre's population                                      |
| Chau et al 2002      | No                       | Yes | 8     | Non-random consecutive sampling                                             |
| Clatts et al 2009    | No                       | Yes | 8     | Non-random sampling; non-representative sample (male IVU only)              |
| Clatts et al 2015    | No                       | Yes | 8     | Non-random; non-representative (sex workers)                                |
| Colby et al 2016     | No                       | Yes | 8     | Non-random sampling; non-representative (sex workers)                       |
| Cordier et al 1993   | No                       | Yes | 8     | Non-random, non-representative, male HCC only                               |
| Corwin et al 1996    | Yes                      | No  | Yes | 8     | Non-random consecutive sampling                                             |
| Dang et al 2020      | Yes                      | No  | Yes | 8     | Non-random consecutive sampling                                             |
| Do et al 2015        | Yes                      | Yes | No  | Yes | Yes | Yes | Yes | Yes | Yes | 8     | Multi-stage cross-sectional                                                 |
| Dunford et al 2012   | Yes                      | No  | Yes | 8     | Non-random consecutive sampling                                             |
| Dunford et al 2012   | Yes                      | No  | Yes | 8     | Non-random consecutive sampling                                             |

|                       |     |     |     |     |     |     |     |     |     |   |                                                                                                                    |
|-----------------------|-----|-----|-----|-----|-----|-----|-----|-----|-----|---|--------------------------------------------------------------------------------------------------------------------|
| Duong et al 2009      | No  | Yes | 8 | Cross sectional but non-representative rural sample                                                                |
| Duong et al 2015 i    | Yes | No  | Yes | 8 | Non-random consecutive sampling                                                                                    |
| Duong et al 2015 ii   | Yes | No  | Yes | 8 | Non-random consecutive sampling                                                                                    |
| Duong et al 2016      | Yes | No  | Yes | 8 | Non-random; entire centre population                                                                               |
| Duong et al 2018      | Yes | No  | Yes | 8 | Non-random consecutive sampling                                                                                    |
| Duong et al 2019      | Yes | No  | Yes | 8 | Non-random; entire centre population                                                                               |
| Follezou et al 1999   | No  | No  | Yes | 6 | Non-representative sample (very high rates HIV)                                                                    |
| Goto et al 2005       | Yes | No  | Yes | 8 | Non-random consecutive sampling                                                                                    |
| Hall et al 2015       | Yes | No  | Yes | No  | Yes | Yes | Yes | Yes | Yes | 7 | Non-random consecutive sampling, lacks baseline characteristics                                                    |
| Hipgrave et al 2003   | Yes | 9 |                                                                                                                    |
| Hoang et al 2015      | Yes | No  | Yes | 8 | Non-random consecutive sampling                                                                                    |
| Ishizaki et al 2017   | Yes | No  | Yes | 8 | Non-random consecutive sampling                                                                                    |
| Kakumu et al 1998     | Yes | No  | Yes | 8 | Non-random consecutive sampling of hepatitis patients. Details of sampling strategy for general population lacking |
| Katellaris et al 1995 | Yes | Yes | No  | Yes | Yes | Yes | Yes | Yes | Yes | 8 | Under powered for HCV prevalence                                                                                   |
| Kha To et al 2020     | Yes | No  | Yes | 8 | Non-random consecutive sampling                                                                                    |
| Lan et al 2008        | No  | Yes | 8 | Non-representative sample (married women age 18-49)                                                                |
| Lien et al 1997       | Yes | No  | Yes | 8 | Non-cross sectional sampling                                                                                       |
| Linh-Vi et al 2019    | Yes | 9 |                                                                                                                    |
| Minh et al 2021       | No  | No  | Yes | 7 | Non-random, non-representative sample (males from infertile couples)                                               |
| Miyakawa et al 2021   | Yes | No  | Yes | Yes | Yes | Yes | Yes | Yes | No  | 7 | Non-random sample, high drop out >30%                                                                              |
| Mohan et al 2017      | Yes | No  | Yes | 8 | Non-random retrospective chart review                                                                              |
| Molès et al 2020      | Yes | No  | Yes | 8 | Non-random response-driven sampling                                                                                |
| Nadol et al 2015      | Yes | No  | Yes | 8 | Non-random response-driven sampling                                                                                |



|                        |     |     |     |     |     |     |     |     |     |   |                                                                                                                            |
|------------------------|-----|-----|-----|-----|-----|-----|-----|-----|-----|---|----------------------------------------------------------------------------------------------------------------------------|
| Nadol et al 2016       | Yes | No  | Yes | 8 | Non-random response-driven sampling                                                                                        |
| Nakata et al 1994      | Yes | No  | Yes | 8 | Non-random consecutive and retrospective sampling                                                                          |
| Nerurkar et al 1999    | Yes | No  | Yes | Yes | Yes | No  | Yes | Yes | Yes | 7 | Non-random sampling, diagnostics were combo of sera or filter paperblotted whole blood                                     |
| Nghiem et al 2021      | Yes | No  | Yes | 8 | Non-random, consecutive sampling                                                                                           |
| Ngo et al 2009         | No  | No  | Yes | No  | Yes | Yes | Yes | Yes | Yes | 6 | Non-random, consecutive sampling, non-representative sample (inpatients and outpatients), minimal baseline characteristics |
| Nguyen et al 1997      | No  | No  | No  | Yes | Yes | Yes | Yes | Yes | Yes | 6 | Non-random consecutive sampling, non-representative sample (patients with severe Dengue), under-powered for HCV            |
| Nguyen et al 2006      | Yes | 9 |                                                                                                                            |
| Nguyen et al 2007      | Yes | 9 |                                                                                                                            |
| Nguyen et al 2011      | Yes | No  | Yes | 8 | Non-random consecutive sampling                                                                                            |
| Nguyen et al 2014      | Yes | 9 |                                                                                                                            |
| Nguyen et al 2017      | No  | No  | Yes | 7 | Non-random consecutive sampling, non-representative                                                                        |
| Nguyen-Dinh et al 2018 | Yes | No  | Yes | 8 | Non-random sampling, Oraquick diagnostics                                                                                  |
| Pham et al 2020        | Yes | 9 | Non-random retrospective sample                                                                                            |
| Pham et al 2020 ii     | Yes | 9 |                                                                                                                            |
| Quan et al 2009        | Yes | No  | Yes | 8 |                                                                                                                            |
| Quesada et al 2015     | No  | Yes | 8 | Non-random snowball sampling using peer recruiters                                                                         |
| Rangarajan et al 2016  | Yes | No  | Yes | 8 | Non-representative sample (females only)                                                                                   |
| Riondel et al 2020     | Yes | No  | Yes | 8 | Non-random consecutive sampling                                                                                            |
| Sinh et al 2012        | Yes | No  | Yes | No  | Yes | Yes | Yes | Yes | Yes | 7 | Non-random response-driven sampling                                                                                        |
| Son et al 2014         | No  | No  | No  | Yes | Yes | Yes | Yes | Yes | Yes | 6 | Non-random consecutive sample, lacking baseline characteristics                                                            |

|                      |     |     |     |     |     |     |     |     |     |   |                                                                                                                           |
|----------------------|-----|-----|-----|-----|-----|-----|-----|-----|-----|---|---------------------------------------------------------------------------------------------------------------------------|
| Song et al 1994      | Yes | No  | Yes | 8 | Non-random consecutive sampling, non-representative (inpatients with penicilliosis), under powered for HBV/HCV prevalence |
| Sy et al 2013        | No  | No  | Yes | 8 | Non-random sampling                                                                                                       |
| Tam et al 2016       | Yes | No  | Yes | 8 | Non-random consecutive sampling, non-representative (HCV and HIV positive patients excluded)                              |
| Tanimoto et al 2010  | Yes | No  | Yes | 8 | Non-random response driven sampling                                                                                       |
| Tanuma et al 2017    | Yes | No  | Yes | 8 | Non-random consecutive sampling                                                                                           |
| Terakawa et al 2011  | No  | No  | Yes | 7 | Non-random sampling, non-representative (healthy workers at major companies)                                              |
| Thanh et al 2020     | No  | No  | Yes | 7 | Non-random consecutive sample, non-representative (HCV-infected outpatients)                                              |
| Tran et al 2003      | No  | No  | Yes | 7 | Non-random sampling, non-representative (healthy outpatients)                                                             |
| Truong et al 2016    | No  | No  | Yes | 7 | Non-random consecutive sample                                                                                             |
| Trung et al 2010     | No  | Yes | 8 | Non-random consecutive sampling                                                                                           |
| Van Be et al 1992    | No  | No  | Yes | No  | Yes | Yes | Yes | Yes | Yes | 6 | Non-random sampling, unclearly defined study populations, no baseline characteristics                                     |
| Van Quang et al 2019 | Yes | No  | Yes | 8 | Non-random, retrospective sample                                                                                          |
| Viet et al 2012      | No  | No  | Yes | 7 | Non-random sampling; non-representative ( <i>potential</i> blood donors, HBV-vaccinated individuals excluded)             |
| Zhang et al 2015     | Yes | No  | Yes | 8 | Non-random sampling                                                                                                       |

1  
2  
3  
4  
5  
6  
7

1 **Figure S1: study populations by location**

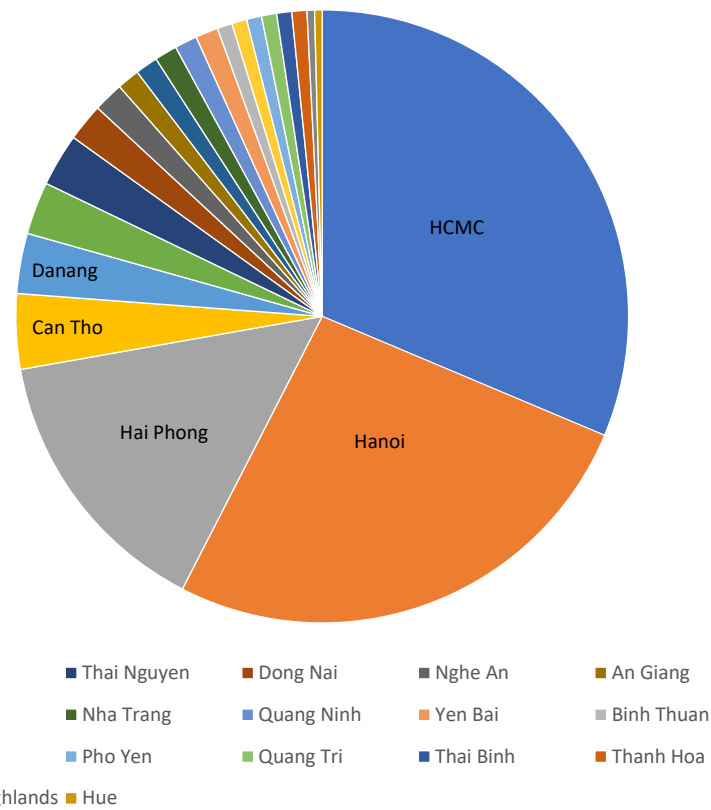

2  
3  
4  
5  
6  
7

6 **Table S6: Studies reporting HCV antibody and HCV antigen or HCV RNA in same population**

| Study               | Population         | Proportion of HCV antibody positive individuals with HCV RNA or antigen | 95% C.I.       |
|---------------------|--------------------|-------------------------------------------------------------------------|----------------|
| Duong et al 2019    | Dialysis           | 100%                                                                    | [71.5 - 100]   |
| Tanimoto et al 2010 | PWID               | 79.30%                                                                  | [74.4 – 83.6]  |
| Kakumu et al 1998   | Liver disease      | 60.90%                                                                  | [48.3 – 72.4]  |
| Le et al 2019       | CSW                | 58.50%                                                                  | [52.4 – 64.4]  |
| Do et al 2015       | General population | 50.00%                                                                  | [26.0 – 74.0]  |
| Kakumu et al 1998   | General population | 44.40%                                                                  | [13.70 - 78.8] |

8  
9  
10  
11  
12

**Figure S2:** estimated pooled HCV antibody prevalence in PWID by region

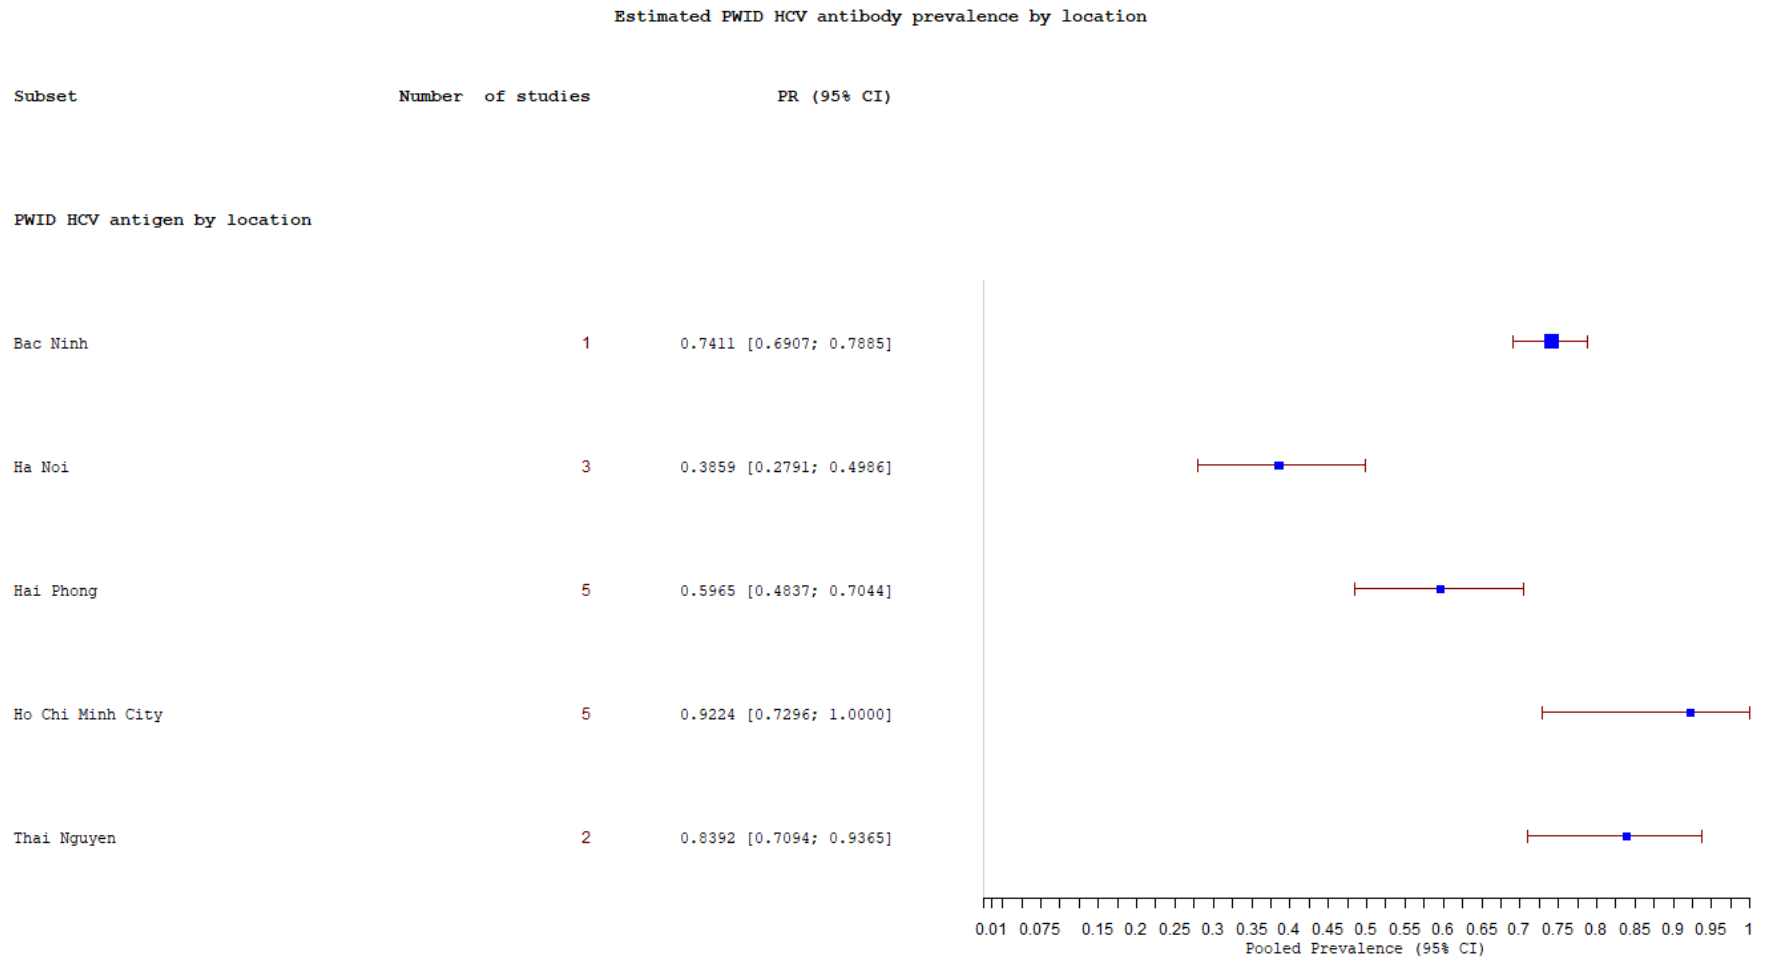

**Figure S3:** estimated pooled HCV antigen prevalence in PWID by region

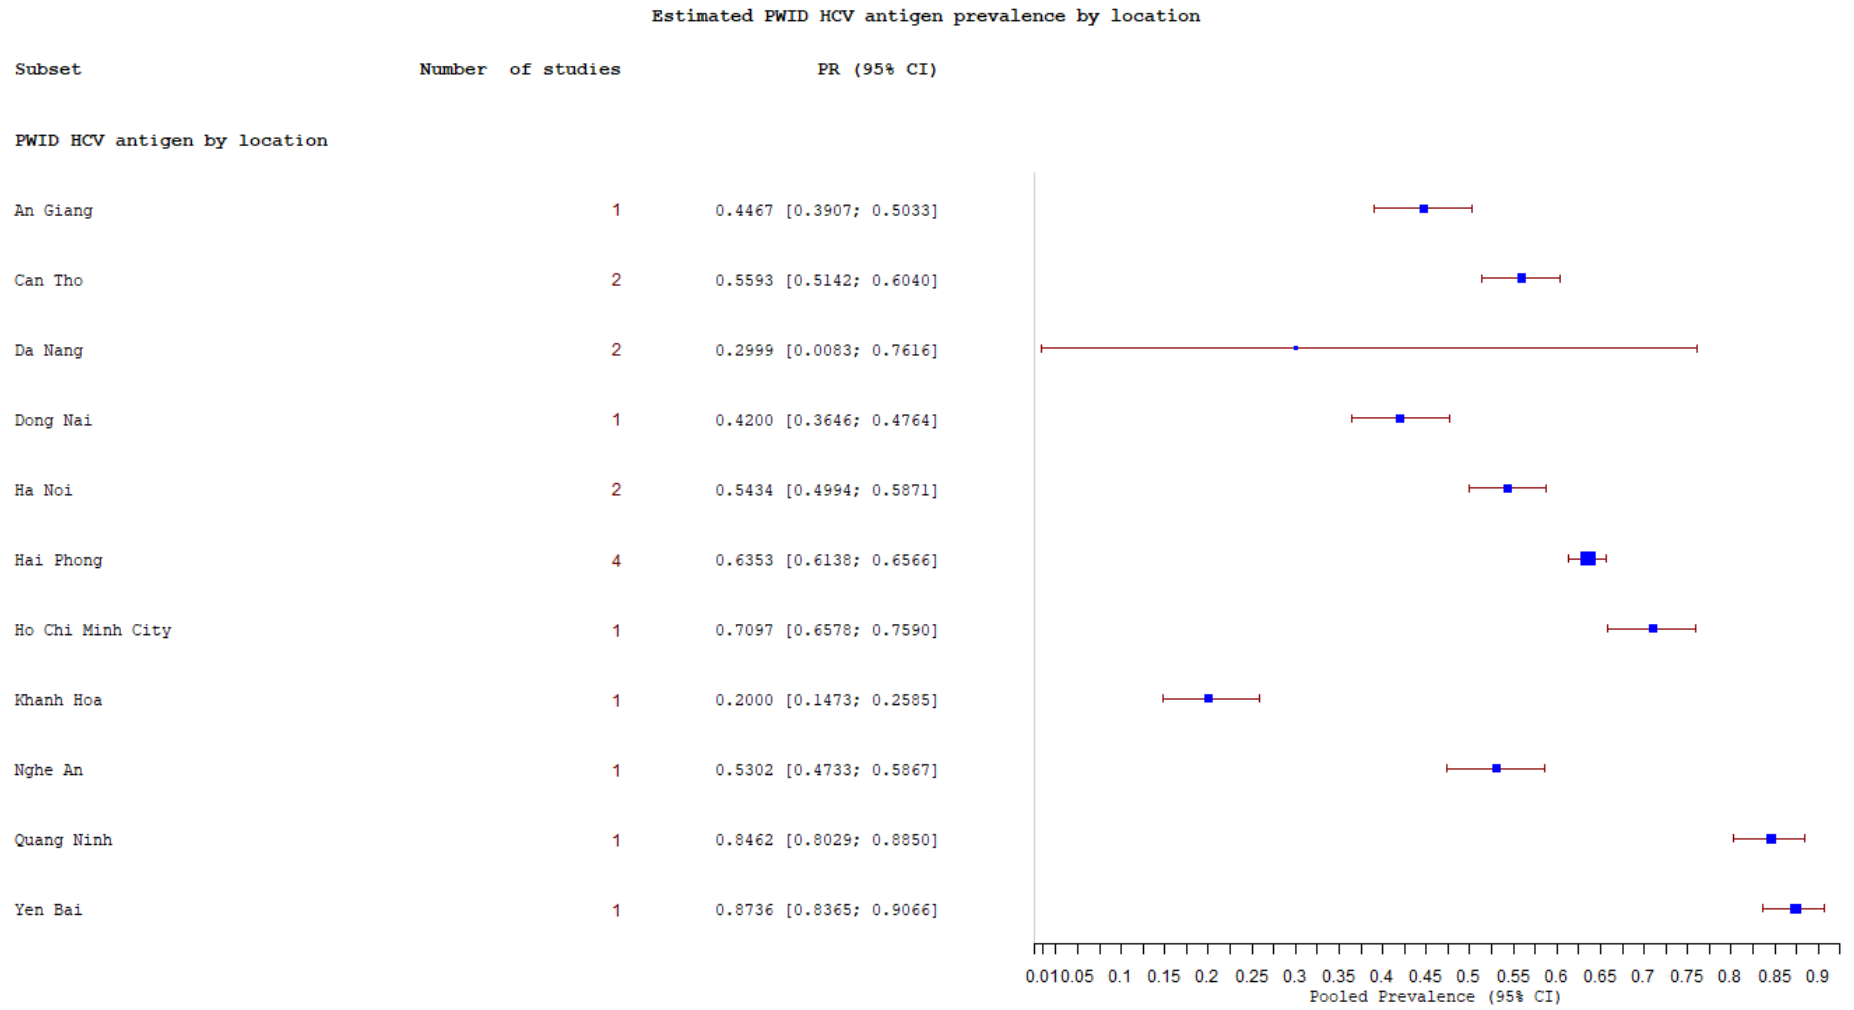

**END OF DOCUMENT**
